# Supplementary material for: Plastidic membrane lipids are oxidized by a lipoxygenase in Lobosphaera incisa
Source: Front Plant Sci. 2022 Dec 22;13:1102215. doi: 10.3389/fpls.2022.1102215 (PMC9813749; doi:10.3389/fpls.2022.1102215)
Supplement: Supplementary file 1 [file Table_1.xlsx]

## Sheet: Lipid data
Supplementary Table S1. Lipidomic analysis of L. incisa during nitrogen starvation.
Peak Area	Rep 1	Rep 2	Rep 3	N+/Day5	SD		Rep 1	Rep 2	Rep 3	N-/Day5	SD		Rep 1	Rep 2	Rep 3	N+/Day7	SD		Rep 1	Rep 2	Rep 3	N-/Day7	SD
DGDG(18:3/16:3)	1865000	1327000	1229000	1.47367e+06			1017000	862000	672000	850333			458000	407000	490000	451667			638000	714000	577000	643000
DGDG(18:3/16:2)	620000	537000	446000	534333			340000	290000	245100	291700			277700	250900	336000	288200			313000	300000	250000	287667
DGDG(18:2/16:3)	277000	285000	262000	274667			111000	114200	66000	97066.7			122100	117900	167700	135900			87900	92700	88300	89633.3
DGDG(18:2/16:2)	1112000	994000	934000	1.01333e+06			287000	282000	305000	291333			520000	445000	709000	558000			315000	337000	296000	316000
DGDG(18:3/18:3)	697000	600000	483000	593333			169000	138000	148000	151667			187000	184000	218000	196333			155000	147000	125000	142333
DGDG(18:3/18:2)	808000	682000	545000	678333			58200	37600	72600	56133.3			305000	274000	351000	310000			59100	57000	71200	62433.3
DGDG(18:2/18:2)	772000	804000	755000	777000			28800	32500	31700	31000			302000	290000	435000	342333			23600	37400	35500	32166.7
DGDG(20:5/18:3)	270900	278600	200700	250067			38900	44600	30200	37900			61600	61100	62500	61733.3			32900	24240	23830	26990
DGDG(20:5/18:2)	289100	349000	257300	298467			16420	15590	14630	15546.7			73400	79400	93200	82000			11810	10620	11600	11343.3
DGDG(20:4/18:3)	1393000	1450000	1039000	1294000			137000	126600	121500	128367			383000	377000	436000	398667			111900	96000	119700	109200
DGDG(20:4/18:2)	1675000	2150000	1510000	1.77833e+06			41100	43900	60100	48366.7			502000	468000	684000	551333			70100	52500	53300	58633.3
Total peak area	9779000	9456600	7661000	8.96553e+06	1.1412e+06		2244420	1986990	1766830	1.77833e+06	239037		3191800	2954300	3982400	1.77833e+06	538276		1818310	1868460	1651430	1.77833e+06	113627
profile	57.4103	58.136	50.8642	55.4702	4.00531		13.1765	12.2153	11.7306	12.3742	0.735885		18.7383	18.162	26.4406	21.1137	4.62228		10.6749	11.4867	10.9645	11.042	0.411403
GlcADG(16:0/18:0)	93000	84600	80100	85900			125000	103380	118000	115460			61100	63300	96600	73666.7			78200	94900	79900	84333.3
GlcADG(16:3/20:3)	71500	55100	65600	64066.7			28300	26400	32800	29166.7			25300	17300	29600	24066.7			30400	28300	32000	30233.3
GlcADG(18:3/18:3)	105000	118000	118000	113667			46000	44400	51900	47433.3			39800	47800	46700	44766.7			53600	43500	51000	49366.7
GlcADG(16:3/20:2)	21500	19700	18700	19966.7			1860	2810	5000	3223.33			9150	7230	12300	9560			4200	6910	4400	5170
GlcADG(18:3/18:2)	66100	65200	60700	64000			4740	10850	9300	8296.67			23900	25400	30900	26733.3			10340	3690	9440	7823.33
GlcADG(16:2/20:2)	36300	44500	41900	40900			3280	6480	3200	4320			16300	13300	15500	15033.3			1890	2320	1860	2023.33
GlcADG(18:2/18:2)	51100	55200	53100	53133.3			3650	1460	3260	2790			30400	32300	35600	32766.7			4120	1410	2270	2600
GlcADG(18:1/18:1)	25100	25800	22900	24600			18700	25200	19200	21033.3			25200	41900	40000	35700			20600	19200	17800	19200
GlcADG(16:0/20:1)	20000	19100	26300	21800			14100	18800	13200	15366.7			17800	15000	6440	13080			12300	10100	15000	12466.7
Total peak area	489600	487200	487300	488033	1357.69		245630	239780	255860	1.77833e+06	8138.81		248950	263530	313640	1.77833e+06	33932.2		215650	210330	213670	1.77833e+06	2688.82
profile	40.8058	40.5716	38.3559	39.9111	1.35193		20.4721	19.9677	20.139	20.1929	0.256475		20.7488	21.9455	24.6869	22.4604	2.01894		17.9734	17.5152	16.8182	17.4356	0.5817
MGDG(18:3/16:3)	8540000	5930000	4750000	6.40667e+06			1848000	3065000	2350000	2421000			2686000	2620000	3190000	2832000			2465000	2246000	2577000	2.42933e+06
MGDG(18:3/16:2)	1832000	1740000	1540000	1704000			172300	271000	213500	218933			766000	744000	961000	823667			309000	232200	216300	252500
MGDG(18:2/16:3)	1919000	1667000	1490000	1692000			238100	321000	280300	279800			777000	783000	975000	845000			333000	276500	260600	290033
MGDG(18:2/16:2)	3092000	2811000	2803000	2902000			179200	265200	254000	232800			1318000	1515000	1895000	1576000			236300	237900	284300	252833
Total peak area	15383000	12148000	10583000	1.27047e+07	2.44794e+06		2437600	3922200	3097800	1.77833e+06	743812		5547000	5662000	7021000	1.77833e+06	819836		3343300	2992600	3338200	1.77833e+06	201021
profile	57.5907	49.1329	44.0225	50.2487	6.85261		9.12586	15.8634	12.886	12.6251	3.37635		20.7668	22.9001	29.2055	24.2908	4.38787		12.5166	12.1036	13.886	12.8354	0.932982
PC(16:3/18:3)	566000	624000	566000	585333			82200	87000	78100	82433.3			264000	229900	356000	283300			97700	76900	104800	93133.3
PC(16:3/18:2)	662020	756960	724466	714482			34966	44592	49400	42986			307466	280873	387000	325113			55966	49490	48931	51462.3
PC(16:2/18:3)	413580	588390	504160	502043			31800	41012	33012	35274.7			238550	190466	247000	225339			27292	27920	35366	30192.7
PC(16:1/18:1)	25710	21700	22350	23253.3			216400	132200	187700	178767			13520	38100	24070	25230			217700	188300	181900	195967
PC(16:0/18:2)	777000	868000	710000	785000			658000	559000	494000	570333			314600	257900	257600	276700			535000	481000	522000	512667
PC(16:0/18:1)	250000	295000	233000	259333			153100	141700	126900	140567			90200	73100	91000	84766.7			131600	93600	109900	111700
PC(18:3/18:2)	120400	105200	107500	111033			131300	103300	88400	107667			56400	43400	67900	55900			69500	78700	72200	73466.7
PC(16:0/20:4)	375000	465000	322400	387467			325000	217000	268000	270000			93800	97200	70700	87233.3			304800	273700	328000	302167
PC(18:3/18:1)	93900	100000	67300	87066.7			116000	100400	80900	99100			24030	24200	32100	26776.7			98600	65900	77700	80733.3
PC(18:2/18:2)	188000	170000	175000	177667			161000	165000	111000	145667			119000	84600	92500	98700			98500	86000	103000	95833.3
PC(18:2/18:1)	223800	278300	169400	223833			241100	238300	194500	224633			104200	100000	111600	105267			274200	212800	232000	239667
PC(18:1/18:1)	107000	111000	95600	104533			192000	138000	139000	156333			62900	126000	123000	103967			150000	110000	122000	127333
PC(20:5/20:4)	202955	223410	233934	220100			0	1910	0	636.667			43400	30800	45300	39833.3			498	1978	1930	1468.67
PC(20:4/20:4)	499000	486000	425000	470000			327000	213000	253000	264333			99900	88100	81100	89700			271000	185000	285000	247000
PC(20:4/18:3)	295800	290700	254600	280367			230600	172000	163300	188633			76000	58800	68800	67866.7			135200	110000	120200	121800
PC(20:4/18:2)	891000	991000	830000	904000			647000	492000	496000	545000			293600	209200	266700	256500			509000	404000	517000	476667
PC(20:4/18:1)	189400	261000	159500	203300			198100	145600	137100	160267			51200	56900	45000	51033.3			197800	134200	185900	172633
Total peak area	5880565	6635660	5600210	6.03881e+06	535556		3745566	2992014	2900312	1.77833e+06	463807		2252766	1989539	2367370	1.77833e+06	193726		3174356	2579488	3047827	1.77833e+06	313374
profile	39.0651	46.7409	40.2438	42.0166	4.13358		24.8821	21.0754	20.842	22.2665	2.26818		14.9653	14.0141	17.0122	15.3305	1.53206		21.0875	18.1696	21.902	20.3864	1.9625
PE(16:1/16:0)	13680	6980	19710	13456.7			59000	32400	79400	56933.3			4760	15720	14000	11493.3			58100	30720	41410	43410
PE(16:0/16:0)	1250	1620	3580	2150			51000	31600	44300	42300			2190	1770	5150	3036.67			29200	21500	26600	25766.7
PE(16:1/18:1)	77300	69800	90700	79266.7			469700	264900	643000	459200			94500	190500	187900	157633			468000	349400	513000	443467
PE(16:0/18:2)	70800	69100	59000	66300			64100	42800	53200	53366.7			39600	52700	52400	48233.3			48900	35780	57500	47393.3
PE(16:0/18:1)	63000	75300	84800	74366.7			188400	102400	164000	151600			72500	99800	108200	93500			129200	101600	82000	104267
PE(16:0/20:4)	210500	258600	169300	212800			136900	116600	143000	132167			75400	70100	68400	71300			129900	94700	127800	117467
PE(18:3/18:1)	51600	53690	48000	51096.7			96600	63700	74700	78333.3			19940	40470	38900	33103.3			42400	44560	43690	43550
PE(18:2/18:1)	143600	158800	150400	150933			144900	91700	141600	126067			120100	147600	130200	132633			81000	87100	98000	88700
PE(20:1/16:1)	4790	2820	1710	3106.67			36000	20400	33700	30033.3			3520	4220	4270	4003.33			42700	22400	35400	33500
PE(20:2/16:0)	44100	61600	42500	49400			37200	45200	28900	37100			19300	14100	17300	16900			35200	33400	37400	35333.3
PE(18:2/18:0)	173000	174000	133507	160169			125000	111740	99000	111913			51200	53800	35200	46733.3			94600	85200	98700	92833.3
PE(18:1/18:1)	210000	191000	236000	212333			186000	92200	198000	158733			199000	319000	298000	272000			138000	112000	145000	131667
PE(22:1/14:0)	22300	16900	10400	16533.3			12100	5300	5200	7533.33			9840	10400	11800	10680			6980	5660	6890	6510
PE(20:1/16:0)	24900	16000	16200	19033.3			13400	11700	15900	13666.7			12500	8840	12500	11280			8630	2230	8650	6503.33
PE(20:0/16:1)	115000	122000	93500	110167			84500	59600	55600	66566.7			64500	43300	88800	65533.3			57600	51700	78000	62433.3
PE(20:0/16:0)	218000	189000	130000	179000			42600	45900	35600	41366.7			122000	84200	132000	112733			27100	30200	35400	30900
PE(20:4/18:3)	107900	93900	87200	96333.3			46800	40000	45500	44100			52100	48400	62100	54200			36000	14330	14500	21610
PE(20:4/18:2)	323000	319000	301000	314333			109800	64500	75800	83366.7			210800	143300	173200	175767			48100	42800	38100	43000
PE(20:4/18:1)	900000	1100000	783000	927667			514000	362000	467000	447667			281200	242800	296700	273567			464000	326900	476000	422300
PE(20:3/18:2)	44300	31600	40600	38833.3			11710	7430	12070	10403.3			14680	13390	13260	13776.7			9530	2617	4022	5389.67
PE(20:4/18:0)	296100	309300	245400	283600			68900	67600	61400	65966.7			77400	61800	67400	68866.7			53160	56400	58900	56153.3
PE(20:3/18:1)	140000	133700	107300	127000			62500	42900	54300	53233.3			31790	25900	25960	27883.3			35800	34820	32540	34386.7
PE(20:2/18:1)	14100	14100	16100	14766.7			12100	15900	11900	13300			6890	9460	3900	6750			19900	4660	13500	12686.7
PE(20:1/18:2)	38800	41900	22000	34233.3			43900	35800	35200	38300			13200	12200	15100	13500			40400	36700	49700	42266.7
PE(20:1/18:1)	27300	19200	26200	24233.3			42900	32000	38784	37894.7			17000	32900	24700	24866.7			34000	20100	22900	25666.7
PE(20:5/20:4)	47800	47800	40800	45466.7			10740	6580	5300	7540			13890	10310	9870	11356.7			4277	1432	3360	3023
PE(20:4/20:4)	814000	873000	703000	796667			200000	115000	172000	162333			312000	226000	318000	285333			135000	105000	112000	117333
PE(20:4/20:3)	176700	192300	133400	167467			34100	24900	35700	31566.7			45800	43400	49500	46233.3			10330	15420	24580	16776.7
PE(20:4/24:0)	66600	85300	71200	74366.7			5560	6120	5667	5782.33			14870	4258	7080	8736			6107	3208	7480	5598.33
Total peak area	4440420	4728310	3866507	4345079	438741		2910410	1958870	2835721	1.77833e+06	529130		2002470	2030638	2271790	1.77833e+06	148032		2294114	1772537	2293022	1.77833e+06	300818
profile	38.1237	45.0729	34.317	39.1712	5.45396		24.9876	18.6731	25.1683	22.943	3.69897		17.1924	19.3572	20.1631	18.9042	1.5363		19.6963	16.8968	20.3516	18.9816	1.83494
PG(16:0/16:0)	10100	10600	8540	9746.67			35700	29000	34000	32900			10500	4140	8670	7770			30900	25100	26900	27633.3
PG(14:0/18:1)	5120	4290	3712	4374			9730	3302	6910	6647.33			3302	4182	2220	3234.67			5240	5140	4293	4891
PG(16:1/16:0)	11030	8720	5600	8450			23090	21240	26100	23476.7			984	6000	12410	6464.67			24640	19990	21840	22156.7
PG(16:2/18:2)	492	1860	0	784			0	1455	0	485			942	0	0	314			2360	984	492	1278.67
PG(16:1/18:3)	94000	84400	54900	77766.7			74400	55300	48300	59333.3			28300	33800	21090	27730			99600	75800	101700	92366.7
PG(14:0/20:3)	47700	44200	25400	39100			20700	21500	20100	20766.7			25200	17000	27300	23166.7			16800	22300	27700	22266.7
PG(16:2/18:1)	942	0	492	478			492	0	492	328			0	1410	0	470			0	492	0	164
PG(16:1/18:2)	1040000	1035000	785000	953333			686000	519000	495000	566667			583000	462000	578000	541000			499000	449000	534000	494000
PG(18:3/16:0)	222000	191500	151800	188433			188800	173800	125100	162567			86300	72500	99400	86066.7			91500	103900	90900	95433.3
PG(16:1/18:1)	42900	42300	33300	39500			107000	79800	74492	87097.3			28600	31600	34800	31666.7			68700	53700	53600	58666.7
PG(16:0/18:2)	1298000	1146000	910000	1118000			422000	348000	317000	362333			752000	634000	766000	717333			282000	303000	292000	292333
PG(16:1/18:0)	8580	16200	9050	11276.7			9410	7350	6350	7703.33			5190	5100	6540	5610			5920	7300	4870	6030
PG(16:0/18:1)	474000	510000	511000	498333			321000	224000	241000	262000			310000	268600	327000	301867			182400	196400	214000	197600
PG(16:0/20:4)	58500	41500	40900	46966.7			70200	53900	61100	61733.3			21880	15340	21500	19573.3			36000	45100	59600	46900
PG(18:3/20:0)	62400	80900	59400	67566.7			1840	492	943	1091.67			8910	15500	11000	11803.3			1460	2080	1840	1793.33
PG(18:2/20:0)	99700	131000	119000	116567			0	0	1860	620			26400	23300	21900	23866.7			1860	492	492	948
PG(20:4/20:0)	125492	202000	151000	159497			942	1390	983	1105			39700	29500	36200	35133.3			0	492	950	480.667
Total peak area	3600956	3550470	2869094	3.34017e+06	408747		1971304	1539529	1459730	1.77833e+06	275229		1931208	1623972	1974030	1.77833e+06	190949		1348380	1311270	1435177	1.77833e+06	63592.2
profile	40.6803	44.2413	37.0778	40.6665	3.58175		22.27	19.1836	18.8644	20.106	1.88086		21.817	20.2358	25.5108	22.5212	2.70706		15.2328	16.3393	18.5471	16.7064	1.68737
PS(16:2/16:1)	6500	2780	3440	4240			17600	19500	22200	19766.7			10300	14900	23100	16100			29500	32000	28800	30100
PS(16:2/16:0)	17800	20600	21100	19833.3			16100	13900	17100	15700			24900	27800	33700	28800			14000	28900	26100	23000
PS(18:2/18:1)	14960	18915	22592	18822.3			18466	12020	18500	16328.7			22000	24231	25300	23843.7			16695	23100	18000	19265
PS(18:3/18:3)	1570000	1370000	1270000	1.40333e+06			477000	548000	498000	507667			501000	459000	543000	501000			520000	509000	590000	539667
PS(18:3/18:2)	723000	721000	741000	728333			92500	102000	119800	104767			307000	289000	393000	329667			108300	115000	120100	114467
PS(18:2/20:2)	652465	836000	667000	718488			32000	52600	50500	45033.3			264000	283000	434000	327000			39966	53700	49300	47655.3
PS(20:0/18:1)	4370	5240	5610	5073.33			55100	30500	41200	42266.7			5180	6240	1340	4253.33			36300	36000	33900	35400
PS(22:1/16:0)	203000	247000	153000	201000			166000	117000	151000	144667			70000	71600	70000	70533.3			115000	135000	135000	128333
PS(22:0/16:1)	16000	16800	15600	16133.3			165000	101000	134000	133333			7880	17600	17600	14360			142000	139000	156000	145667
PS(22:0/16:0)	111000	145000	128403	128134			58400	42500	40500	47133.3			47800	48100	41200	45700			45500	40400	39300	41733.3
PS(20:4/20:0)	11000	13800	13500	12766.7			28500	16900	11600	19000			4300	1410	2270	2660			14300	14000	18900	15733.3
PS(22:1/18:3)	55100	62200	57700	58333.3			56000	48700	45200	49966.7			28000	25800	32200	28666.7			24700	36300	42600	34533.3
PS(22:1/18:2)	188000	194000	158000	180000			150000	145000	98500	131167			114000	71100	96400	93833.3			109000	88400	92900	96766.7
PS(22:0/18:3)	50300	68500	59000	59266.7			73100	76800	50000	66633.3			24300	14300	19400	19333.3			63900	64000	77100	68333.3
PS(22:1/18:1)	72600	61600	56600	63600			58300	74200	49500	60666.7			28700	22100	15500	22100			70700	69600	44700	61666.7
PS(22:0/18:2)	147000	166000	129000	147333			170000	161000	147000	159333			78800	65200	79800	74600			172000	188000	180000	180000
PS(22:0/18:1)	94800	95200	94400	94800			219000	134000	127000	160000			56900	133000	110000	99966.7			125000	124000	111000	120000
PS(22:1/20:4)	275000	297000	237000	269667			184000	168000	151000	167667			118000	66500	77200	87233.3			134431	126000	140000	133477
Total peak area	4212895	4341635	3832945	4.12916e+06	264481		2037066	1863620	1772600	1.77833e+06	134357		1713060	1640881	2015010	1.77833e+06	198476		1781292	1822400	1903700	1.77833e+06	62294
profile	43.2344	44.9048	40.244	42.7944	2.36132		20.9052	19.2751	18.6114	19.5972	1.18032		17.5801	16.9713	21.1566	18.5694	2.26121		18.2803	18.8488	19.9879	19.039	0.869545
SQDG(14:0/16:2)	189200	167600	135400	164067			145200	131800	101990	126330			102180	88980	116400	102520			126900	114700	118800	120133
SQDG(14:0/16:1)	629600	562200	499300	563700			158910	142450	117450	139603			250790	212900	298700	254130			101360	116590	120120	112690
SQDG(14:0/16:0)	239340	186350	214340	213343			25892	31200	22670	26587.3			81900	89010	97590	89500			11300	11680	15300	12760
SQDG(16:0/18:3)	86700	88800	67100	80866.7			64300	41700	46830	50943.3			20410	24870	16150	20476.7			44400	39900	47700	44000
SQDG(16:0/18:2)	224600	260900	180800	222100			192900	169500	159500	173967			101000	71000	86600	86200			140500	130100	134100	134900
SQDG(18:3/18:2)	39800	40000	34600	38133.3			34900	26900	28200	30000			20140	8730	31400	20090			16410	26240	25800	22816.7
SQDG(16:0/20:4)	114300	146600	94700	118533			94300	55400	79900	76533.3			24520	29480	30140	28046.7			86200	71200	89400	82266.7
SQDG(18:2/18:2)	58400	52400	50500	53766.7			46500	43700	25100	38433.3			28900	31900	36100	32300			28600	36000	32800	32466.7
SQDG(18:2/18:1)	71800	83100	58000	70966.7			86000	67200	62900	72033.3			30060	26910	27600	28190			85300	65200	74100	74866.7
SQDG(18:3/20:4)	104200	86600	86800	92533.3			74000	41700	54100	56600			16030	16030	21670	17910			42400	29830	40490	37573.3
SQDG(18:2/20:4)	296200	306200	270500	290967			200900	135100	135400	157133			94900	67800	92100	84933.3			133400	129900	151000	138100
SQDG(18:1/20:4)	56300	72300	53600	60733.3			51000	45500	49500	48666.7			22300	6620	13510	14143.3			50500	44000	69200	54566.7
Total peak area	2110440	2053050	1745640	1969710	196160		1174802	932150	883540	1.77833e+06	156032		793130	674230	867960	1.77833e+06	97696.9		867270	815340	918810	1.77833e+06	51735.1
profile	42.6727	45.8806	39.5303	42.6945	3.17517		23.7543	20.8312	20.0079	21.5312	1.96881		16.0369	15.0674	19.6551	16.9198	2.41794		17.536	18.2208	20.8066	18.8545	1.72491
TAG(50:1)	4520	9050	36300	16623.3			91800	76600	54800	74400			15960	1990	11810	9920			77900	26650	525	35025
TAG(52:6)	3150	3020	22830	9666.67			111900	81120	78400	90473.3			17760	0	3120	6960			77440	69300	0	48913.3
TAG(52:5)	0	4680	5343	3341			87000	44200	37700	56300			4650	525	2620	2598.33			39900	58700	0	32866.7
TAG(52:3)	4560	29870	171310	68580			253210	250040	125870	209707			97175	4190	85306	62223.7			231100	97040	2030	110057
TAG(52:2)	4720	33830	264865	101138			340990	287260	202260	276837			78055	3640	60620	47438.3			314935	174870	5170	164992
TAG(52:1)	0	1880	28600	10160			27400	30600	25600	27866.7			10600	2510	7530	6880			16400	13400	0	9933.33
TAG(54:7)	0	30910	153535	61481.7			290630	225910	196610	237717			79930	0	23825	34585			212460	206940	1570	140323
TAG(54:6)	5940	90800	724000	273580			1020000	867000	576700	821233			281300	3060	158900	147753			946000	924000	3390	624463
TAG(54:5)	525	77800	669000	249108			1281000	799000	592900	890967			158200	4720	131500	98140			898000	685000	0	527667
TAG(54:3)	8900	14000	291000	104633			280000	240000	135000	218333			45100	6790	78100	43330			220000	130000	10300	120100
TAG(54:2)	4100	5715	168700	59505			181600	99500	70300	117133			18550	1570	27010	15710			132400	70600	0	67666.7
TAG(56:8)	7995	47210	432300	162502			447100	413200	225500	361933			117150	6530	71490	65056.7			354000	307400	0	220467
TAG(56:7)	4020	93350	847300	314890			971000	818000	555000	781333			138700	6820	127200	90906.7			675500	643800	0	439767
TAG(56:6)	1570	66580	761400	276517			1530500	1052100	1145800	1242800			98380	0	159620	86000			844500	902200	0	582233
TAG(56:5)	0	20960	248529	89829.7			377930	247050	376430	333803			39650	2100	44350	28700			306350	233820	1570	180580
TAG(58:11)	0	22280	128230	50170			195250	106880	138630	146920			78220	1050	44280	41183.3			101815	91980	0	64598.3
TAG(58:10)	4720	55050	598520	219430			595920	506440	541270	547877			233770	0	117190	116987			447140	428850	0	291997
TAG(58:9)	2510	55860	612990	223787			679830	509910	647000	612247			165950	2620	119130	95900			640830	419640	0	353490
TAG(60:12)	2510	40200	293000	111903			190000	114000	204000	169333			132000	4200	87000	74400			150000	129000	0	93000
Total peak area	59740	703045	6457752	2.40685e+06	3.5229e+06		8953060	6768810	5929770	1.77833e+06	1.56073e+06		1811100	52315	1360601	1.77833e+06	913591		6686670	5613190	24555	1.77833e+06	3.57699e+06
profile	0.341165	5.35149		2.84633	3.54284		51.1295	51.5234	43.0546	48.5691	4.7798		10.3429		9.87899	10.1109	0.328033		38.1865	42.7269		40.4567	3.21058
DAG(18:3/16:3)	4420000	12110000	5580000	3.47667e+06			1989000	164400	306000	392567			15960	1990	11810	240333			77900	26650	525	156500
DAG(18:2/16:3)	1578000	4340000	1941000	3.89333e+06			325000	37500	63700	427233			95815	3640	63740	311000			392375	244170	5170	161500
DAG(18:3/16:2)	1094000	3180000	1494000	1.19633e+06			207800	9060	30100	69566.7			101825	4715	87926	136333			271000	155740	2030	36150
DAG(18:2/16:2)	2760000	7220000	3310000	1080000			274000	35200	62200	49280			90530	2510	31355	88066.7			228860	220340	1570	25100
DAG(18:2/16:0)	4920000	1674000	2870000	842667			1146000	788000	706000	33040			439500	7780	290400	79600			1844000	1609000	3390	19800
DAG(18:1/16:0)	3510000	884000	1886000	1.42333e+06			1165000	1089000	912000	72500			63650	8360	105110	142667			352400	200600	10300	40500
DAG(18:3/18:3)	184000	387000	104000	2.12667e+06			21400	12900	4460	57266.7			117150	6530	71490	226667			354000	307400	0	28550
DAG(18:3/18:2)	405000	543000	390000	2.30333e+06			92300	109300	43900	66533.3			237080	6820	286820	184333			1520000	1546000	0	30000
DAG(20:4/16:0)	1367000	293700	1087800	1.69967e+06			617700	830000	316100	486000			273420	2100	161540	422000			753490	662670	1570	736000
DAG(18:2/18:2)	1380000	562000	651000	1455000			207000	220000	158000	394000			78220	1050	44280	277667			101815	91980	0	778500
DAG(18:2/18:1)	3430000	828000	1539000	1.00167e+06			1005000	1203000	857000	517667			297950	6820	206130	345000			790830	548640	0	1068500
DAG(18:1/18:1)	3040000	535000	2040000	1.09167e+06			1610000	2030000	974000	537667			0	0	0	290400			0	0	0	998500
DAG(18:1/18:0)	720000	84100	515000	225000			420000	565000	264000	12920			1.81111e+06	52315	1.36061e+06	22313.3			6.68671e+06	5.61323e+06	24555	7970
DAG(20:4/20:4)	1410000	760000	632000	164333			300000	139000	131000	29700			0	0	0	16000			0	0	0	33850
Total peak area	30218000	33400800	24039800	2.92195e+07	4.7597e+06		9380200	7232360	4828460	1.77833e+06	2.27707e+06		3.62221e+06	104630	2.72121e+06	1.77833e+06	1.82719e+06		1.33734e+07	1.12264e+07	49110	1.77833e+06	7.15399e+06
profile	53.3946	64.2765	75.9825	64.5512	11.2965		16.5746	13.918	15.2613	15.2513	1.32835		6.40037		8.60093	7.50065	1.55603		23.6305	21.6041		22.6173	1.43283
